# Supplementary material for: Thigh Circumference and Diabetes: Obesity as a Potential Effect Modifier
Source: PubMed Central journal article supplement (PMC3775526; doi:10.2188/jea.je20120174), 2013-09-05
Supplement: je-23-329-s001.pdf [file je-23-329-s001.pdf]

eTable 1. Odds ratios (95% CIs) for the association between thigh circumference and diabetes among 199,423 men aged 30-79 years.

|              | Body mass index, kg/m <sup>2</sup> |                    |                    |                    |                    |
|--------------|------------------------------------|--------------------|--------------------|--------------------|--------------------|
|              | <21.0                              | 21.0-22.9          | 22.9-24.9          | 25.0-27.4          | 27.5+              |
| 2.5 (<43)    | 3.59 (2.65-4.85)                   | 1.96 (1.51-2.55)   | 1.93 (1.41-2.63)   | 1.00 (0.52-1.94)   | 1.44 (0.45-4.60)   |
| 5 (43- <44)  | 2.34 (1.73-3.16)                   | 2.14 (1.75-2.61)   | 1.85 (1.48-2.31)   | 1.64 (1.13-2.37)   | 1.78 (0.79-4.00)   |
| 10 (44- <46) | 1.97 (1.40-2.76)                   | 2.27 (1.86-2.78)   | 2.04 (1.65-2.52)   | 1.43 (1.00-2.06)   | 0.22 (0.05-0.96)   |
| 25 (46- <48) | 1.58 (1.20-2.07)                   | 1.53 (1.35-1.73)   | 1.52 (1.37-1.68)   | 1.21 (1.06-1.38)   | 0.89 (0.63-1.26)   |
| 50 (48- <54) | 1.00                               | 1.00               | 1.00               | 1.00               | 1.00               |
| 75 (54- <57) | 0.96 (0.30-3.10)                   | 0.65 (0.47-0.90)   | 0.67 (0.58-0.77)   | 0.70 (0.64-0.77)   | 0.87 (0.78-0.97)   |
| 90 (57- <59) | NE                                 | 0.69 (0.32-1.49)   | 0.40 (0.28-0.58)   | 0.54 (0.46-0.63)   | 0.69 (0.60-0.78)   |
| 95 (59- <61) | NE                                 | 0.76 (0.18-3.20)   | 0.58 (0.34-0.99)   | 0.50 (0.40-0.64)   | 0.66 (0.57-0.77)   |
| 97.5 (>=61)  | NE                                 | 0.48 (0.07-3.57)   | 0.75 (0.41-1.36)   | 0.59 (0.44-0.79)   | 0.54 (0.46-0.63)   |
|              |                                    |                    |                    |                    |                    |
| AUC          | 0.829 (0.814-0.845)                | 0.821(0.812-0.831) | 0.799(0.791-0.807) | 0.757(0.749-0.765) | 0.741(0.732-0.751) |

Abbreviations: AUC, area under the curve; NE: not estimated due to small sample size. Adjusted for age, smoking status, exercise, family history of diabetes, and waist circumference.
